# Supplementary material for: Oligodendrocyte-mediated myelin plasticity and its role in neural synchronization
Source: eLife journal article supplement (doi:10.7554/elife.81982), 2023-03-23

**A**  $\sigma_\tau(t)$ : the mean value over  $n_r=4$  runs (for each set)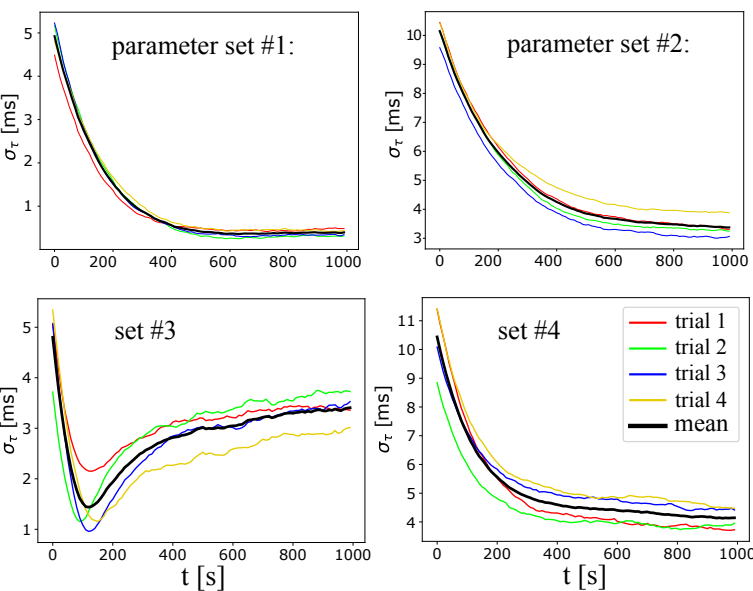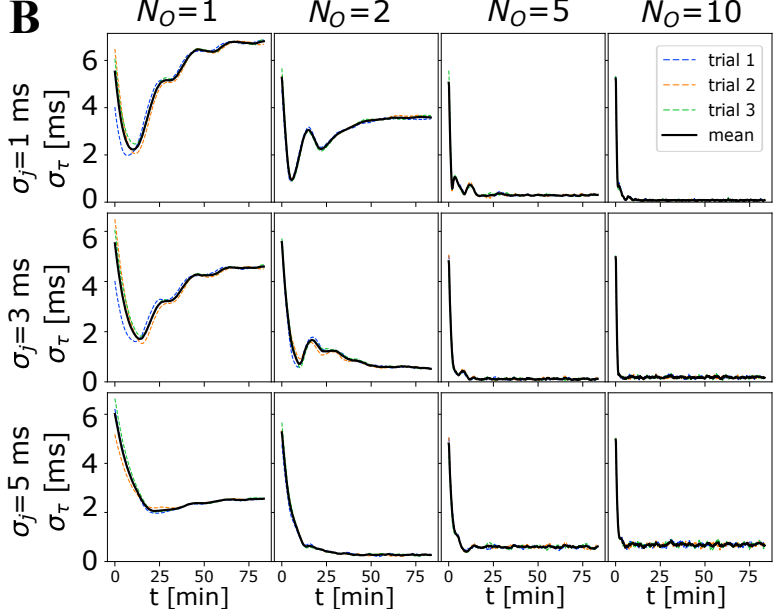**C** Average  $\sigma_\tau(t)$  over parameter sets within each group labeled with  $\tau_G$ 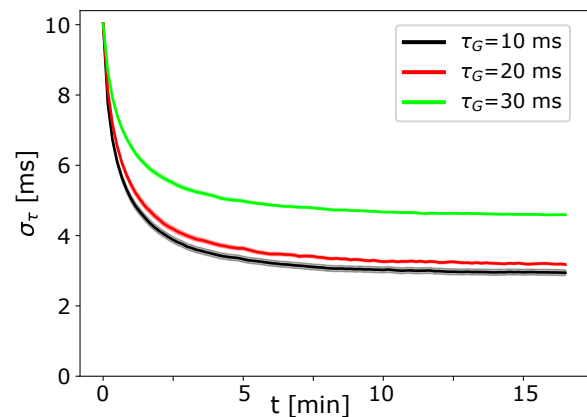All  $\sigma_\tau(t)$  from Table 2a sets ( $\sigma_D=10$  ms)  $\rightarrow$  Model Fitting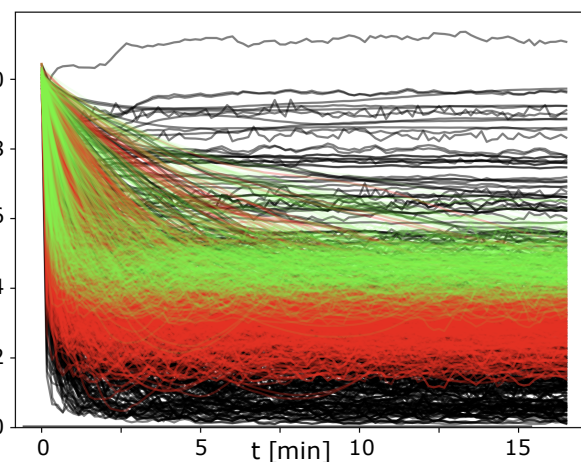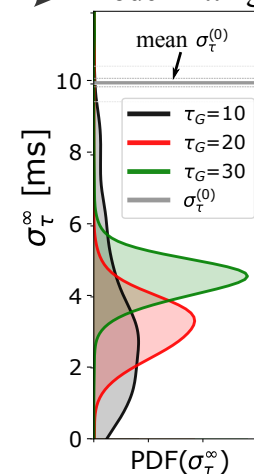**D**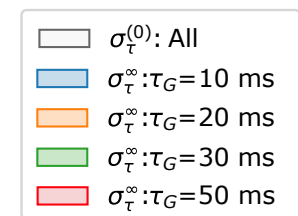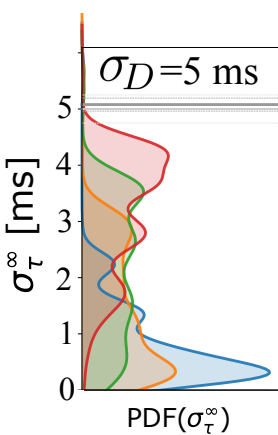**E**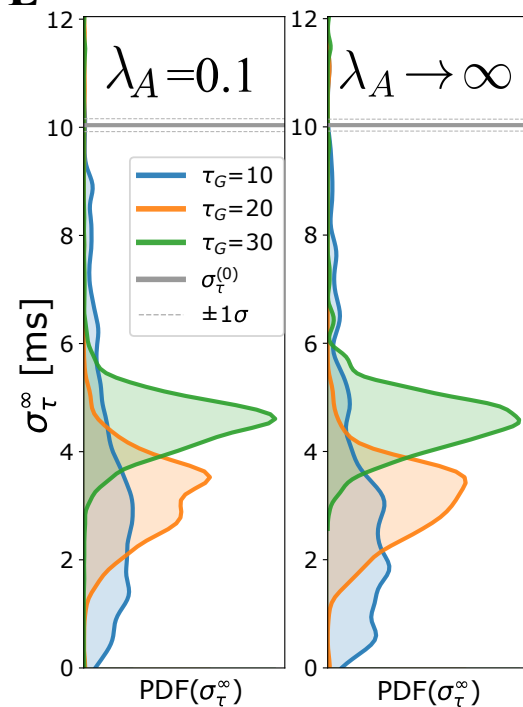**F**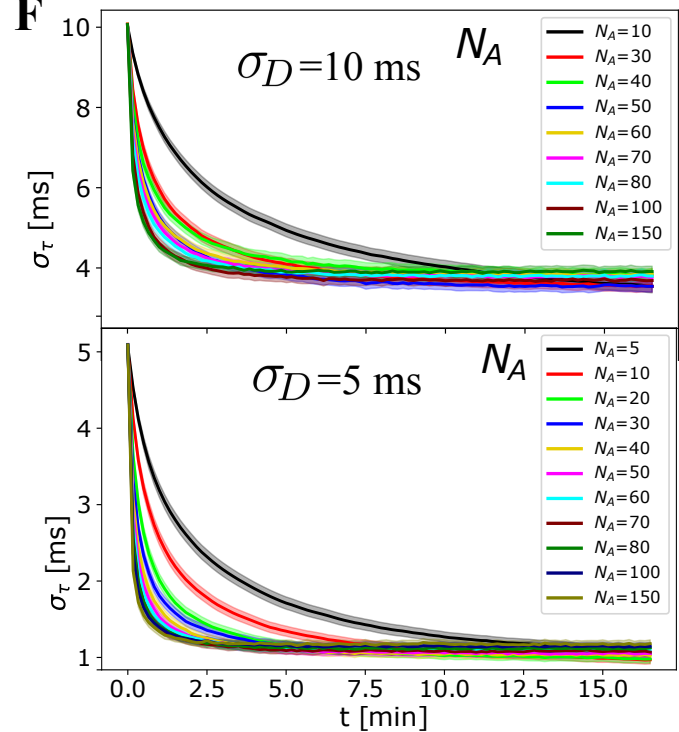

Supplement: supp [file elife-81982-supp-v1.zip]
