# Supplementary figures and images for: Oligodendrocyte-mediated myelin plasticity and its role in neural synchronization
Source: eLife journal article supplement (doi:10.7554/elife.81982), 2023-03-23

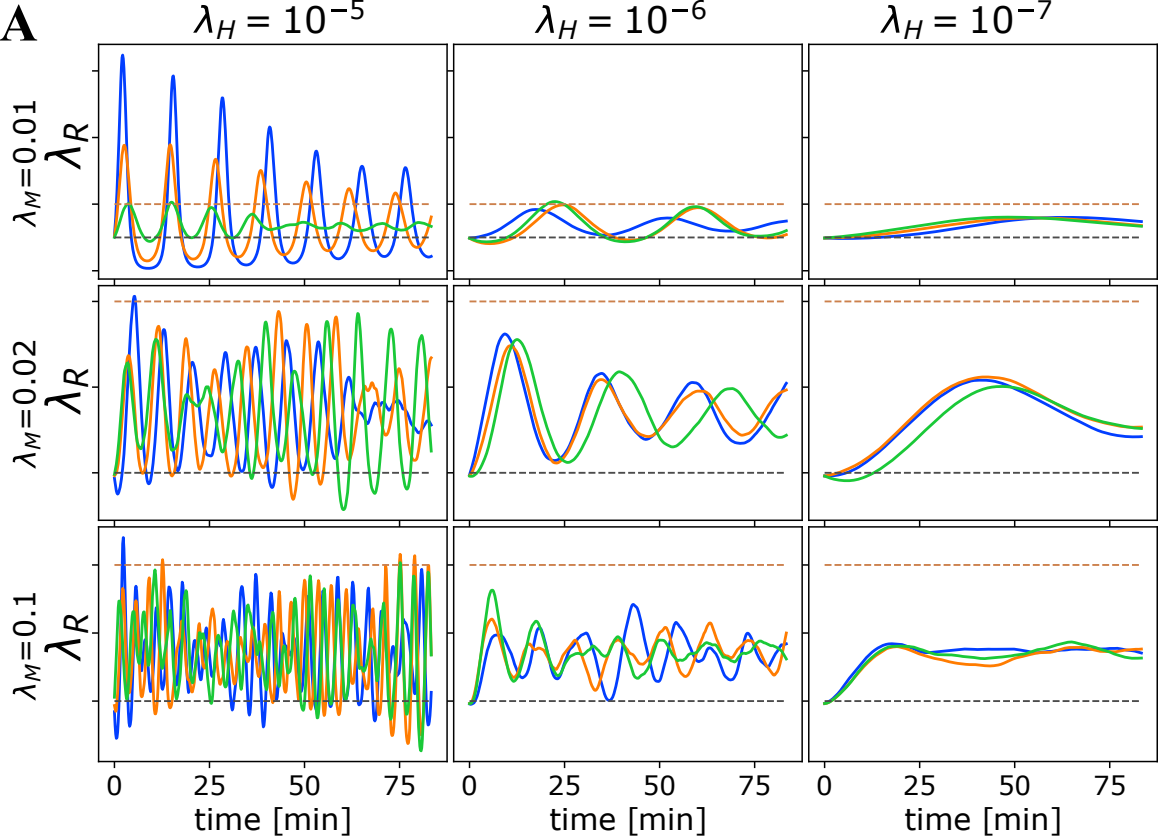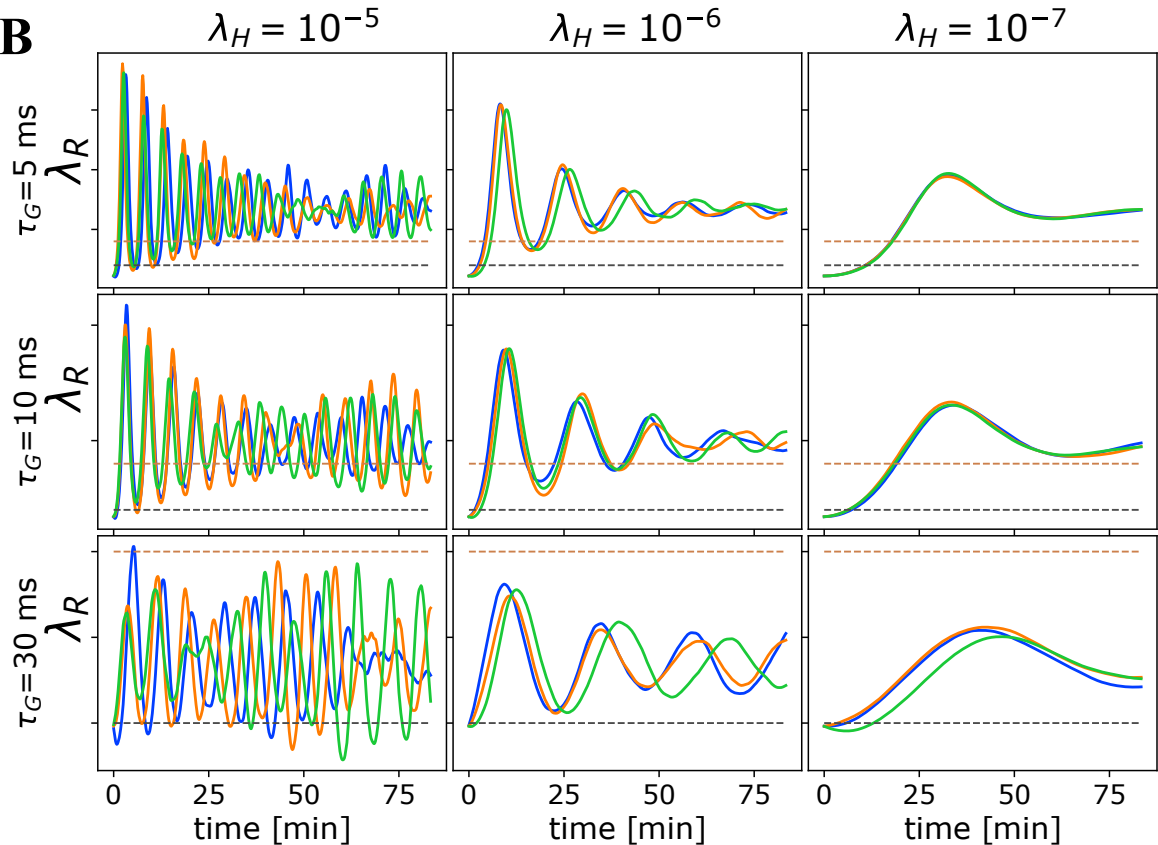

Supplement: supp [file elife-81982-supp-v1.zip]

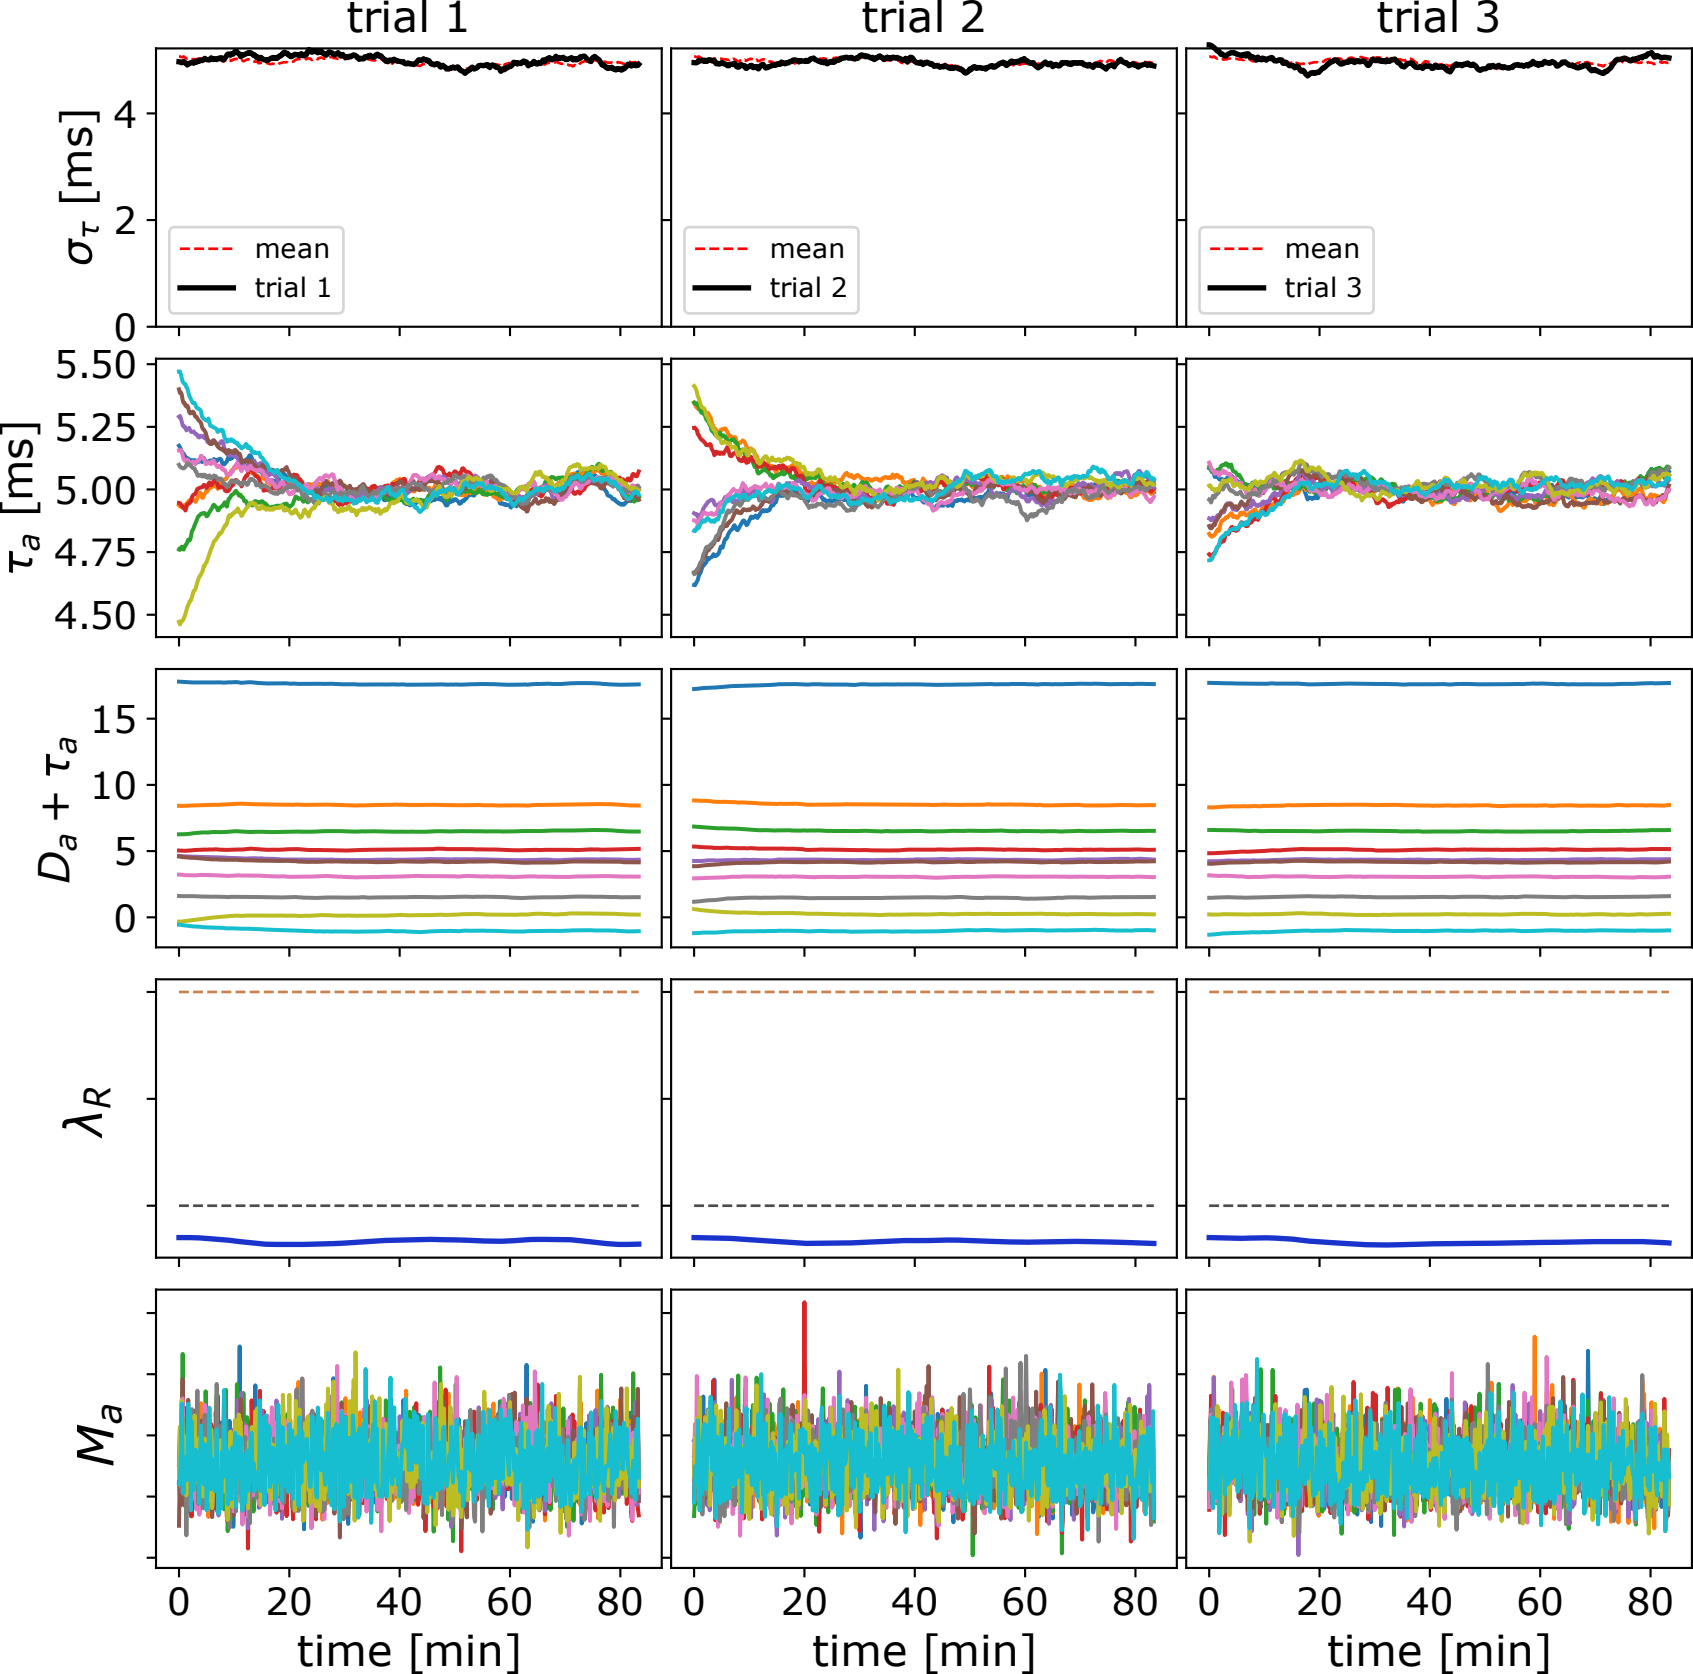

Supplement: supp [file elife-81982-supp-v1.zip]

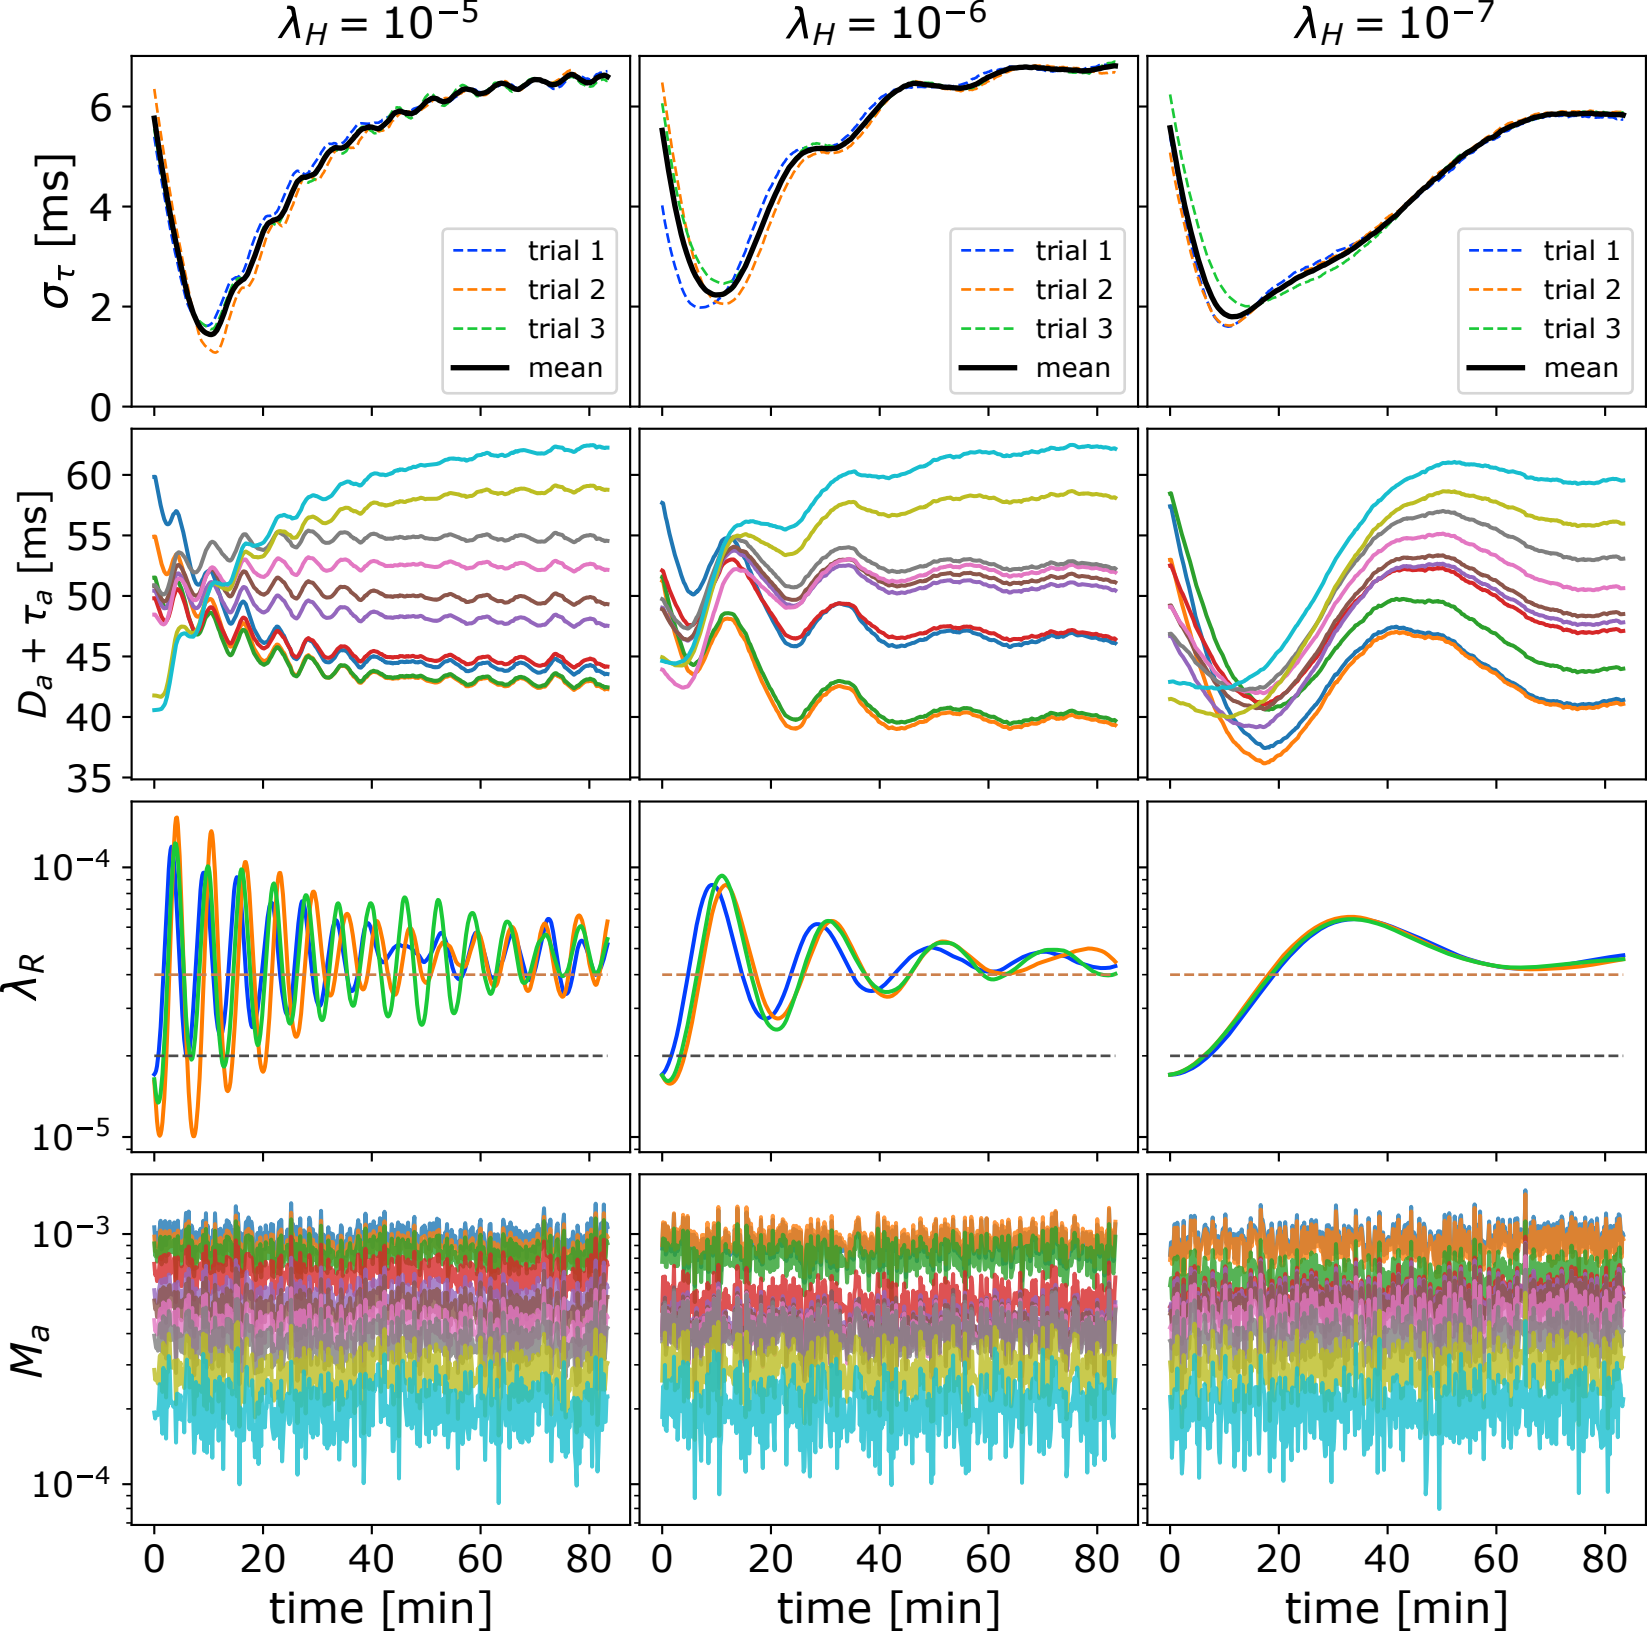

Supplement: supp [file elife-81982-supp-v1.zip]

A

Pure Poisson process ( $t_R=0$ )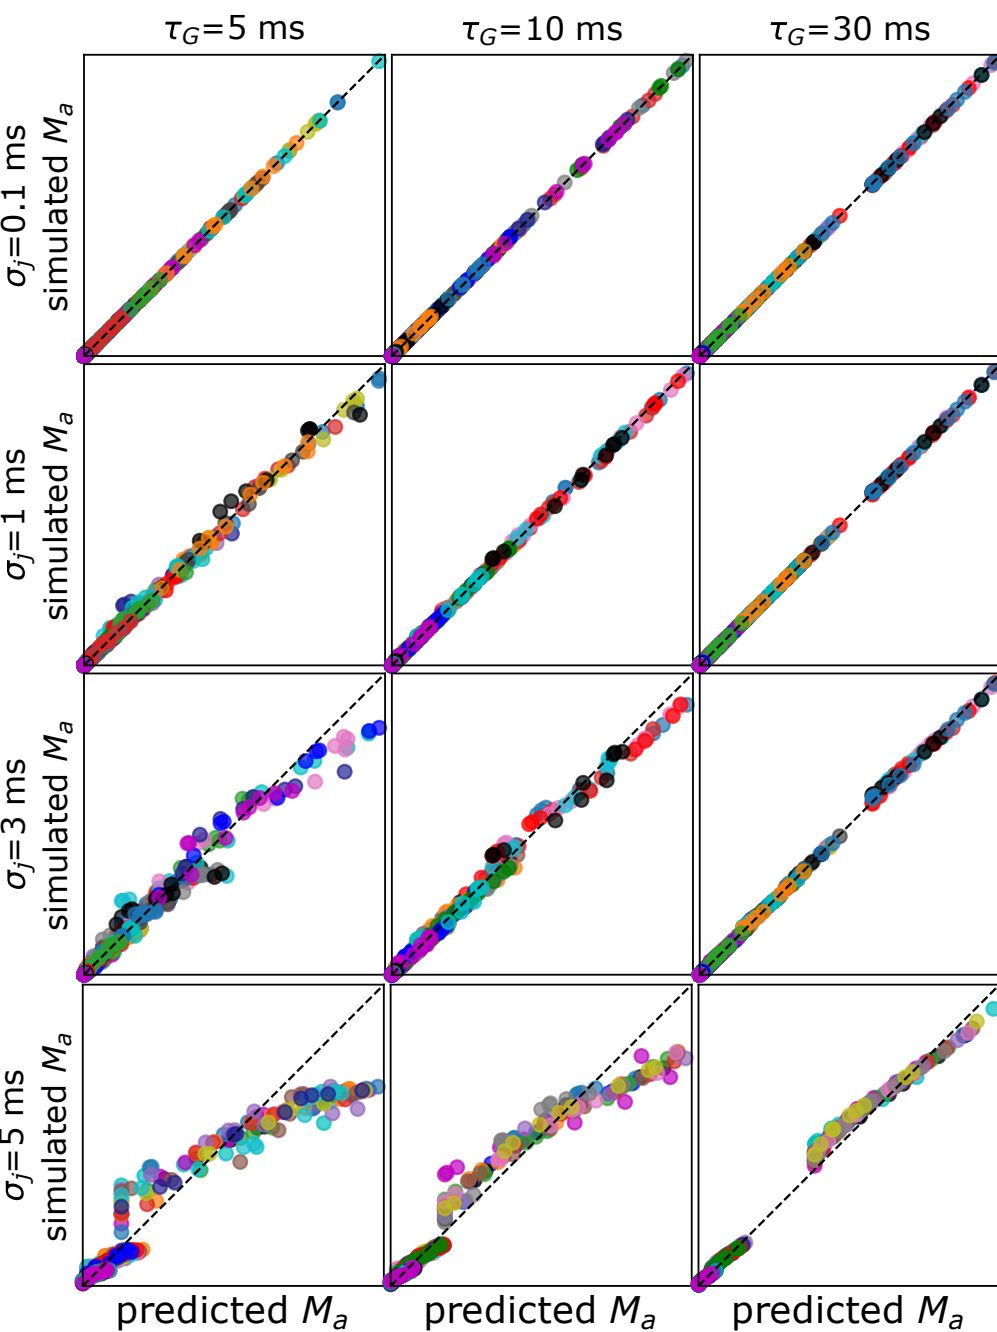

B

Refractory Poisson process ( $t_R=30, 80$  ms)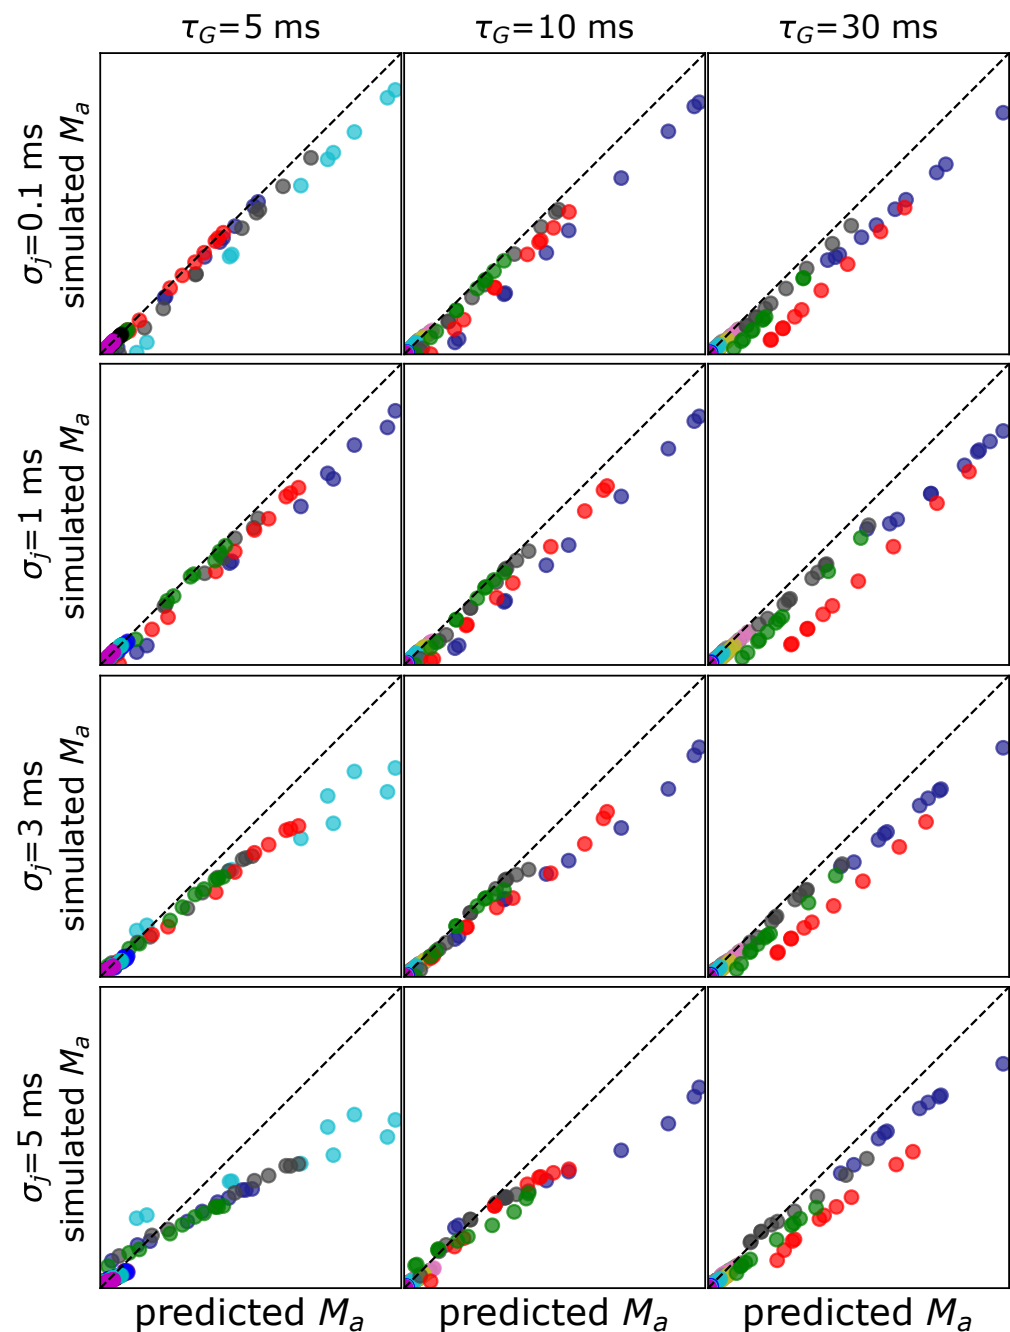

Supplement: supp [file elife-81982-supp-v1.zip]

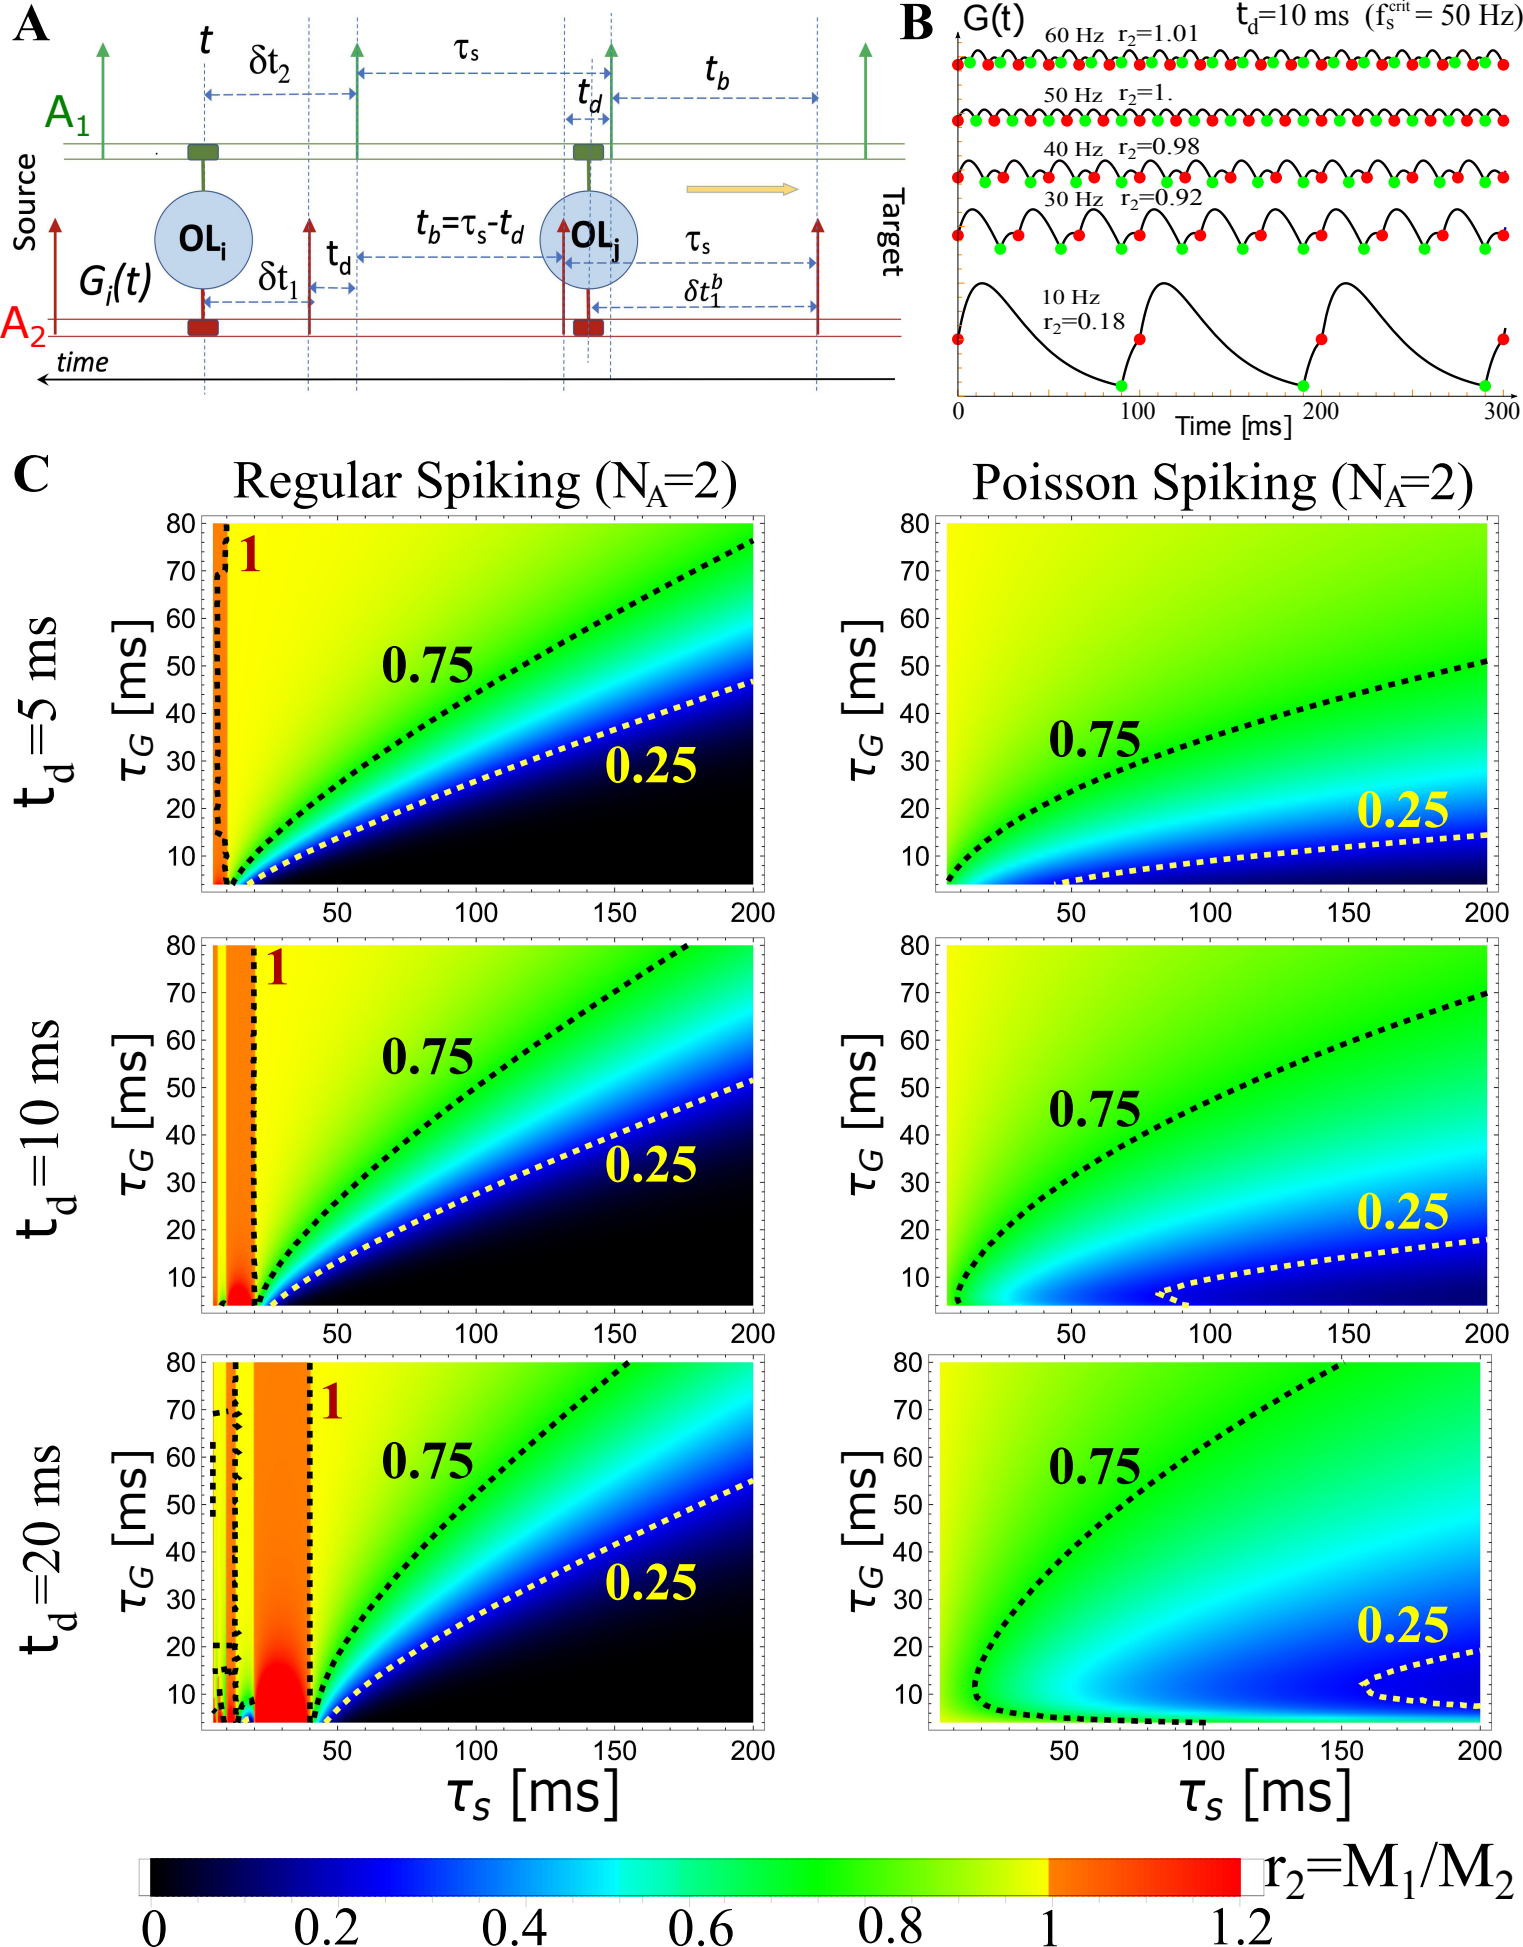

Supplement: supp [file elife-81982-supp-v1.zip]

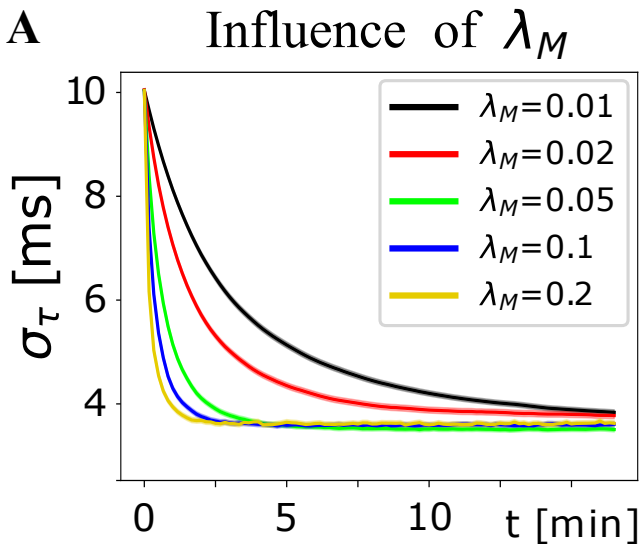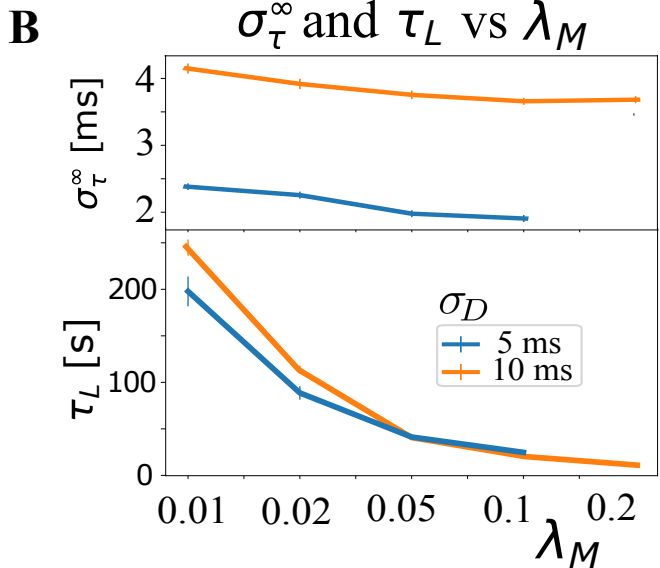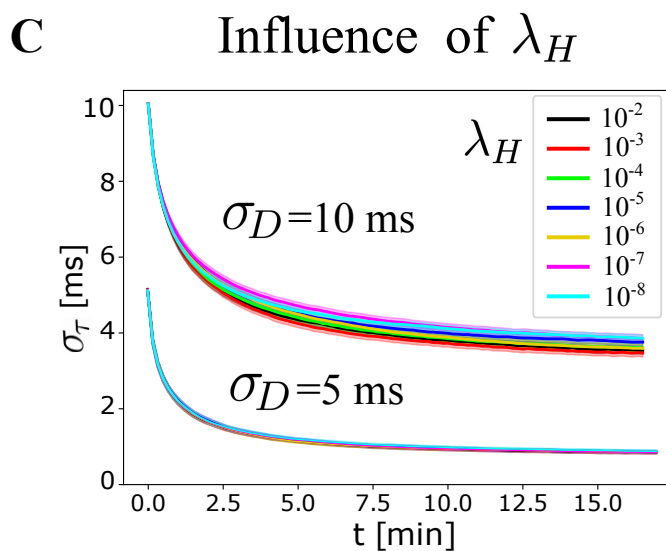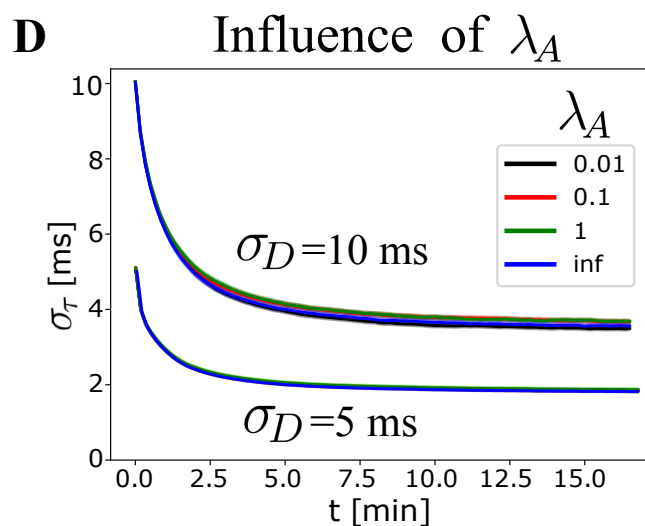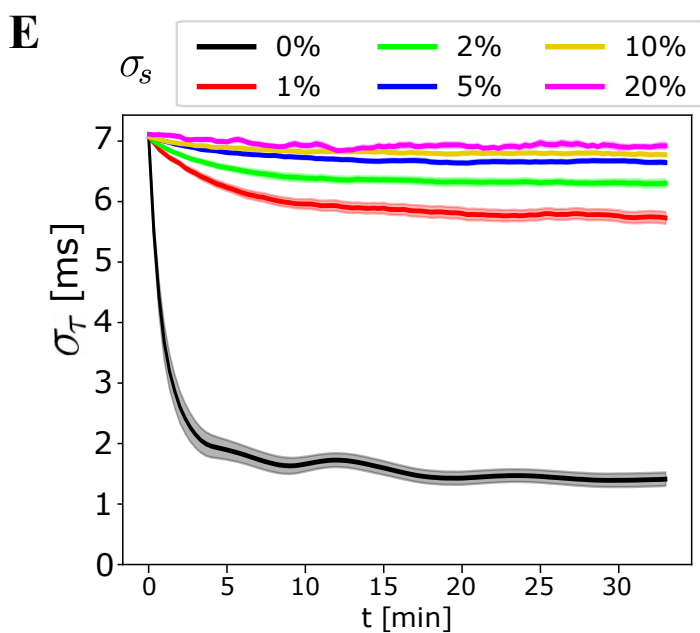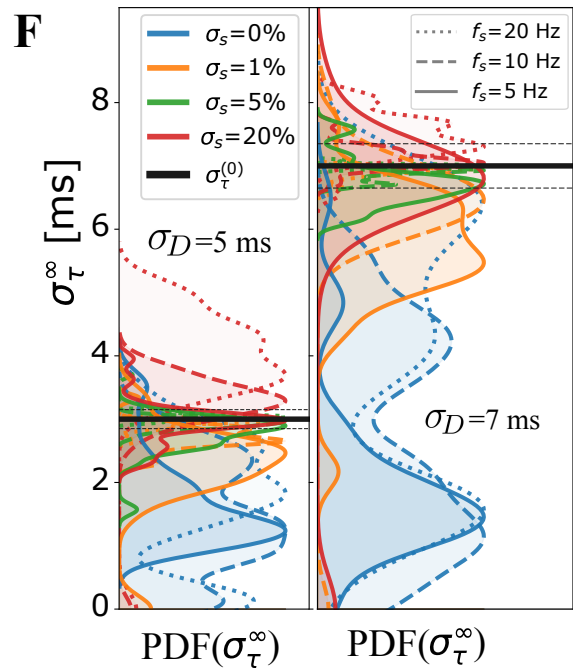

Supplement: supp [file elife-81982-supp-v1.zip]

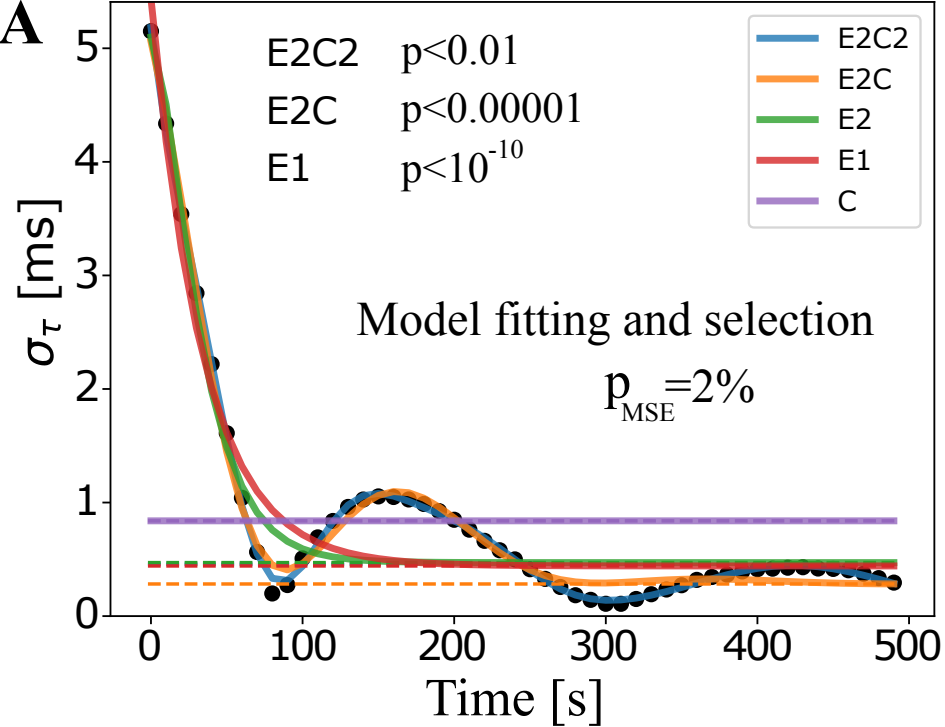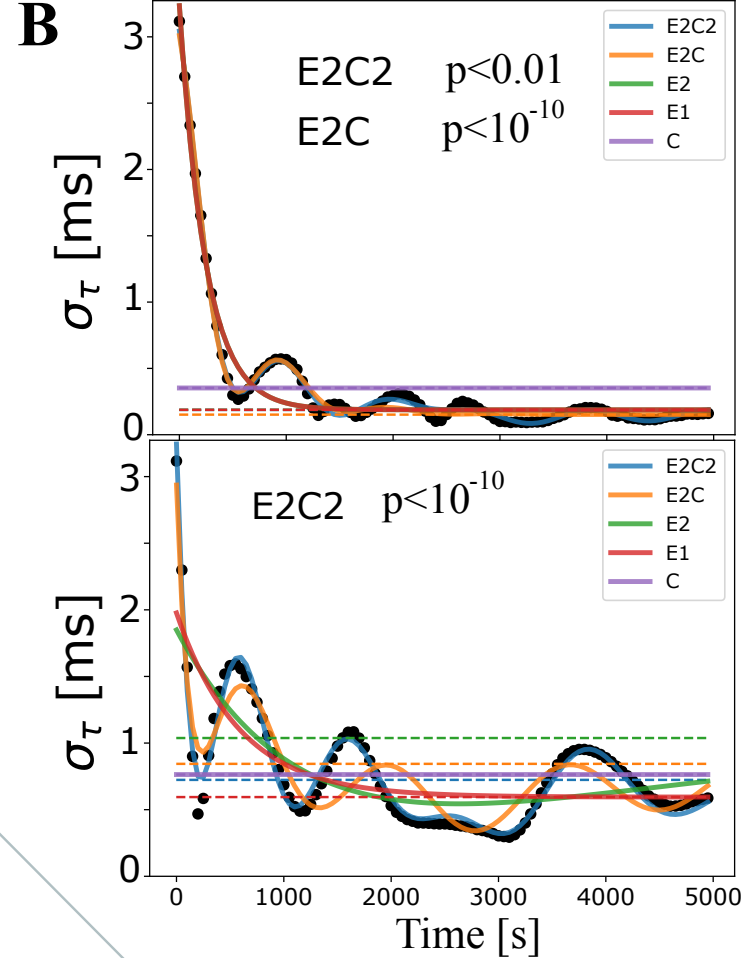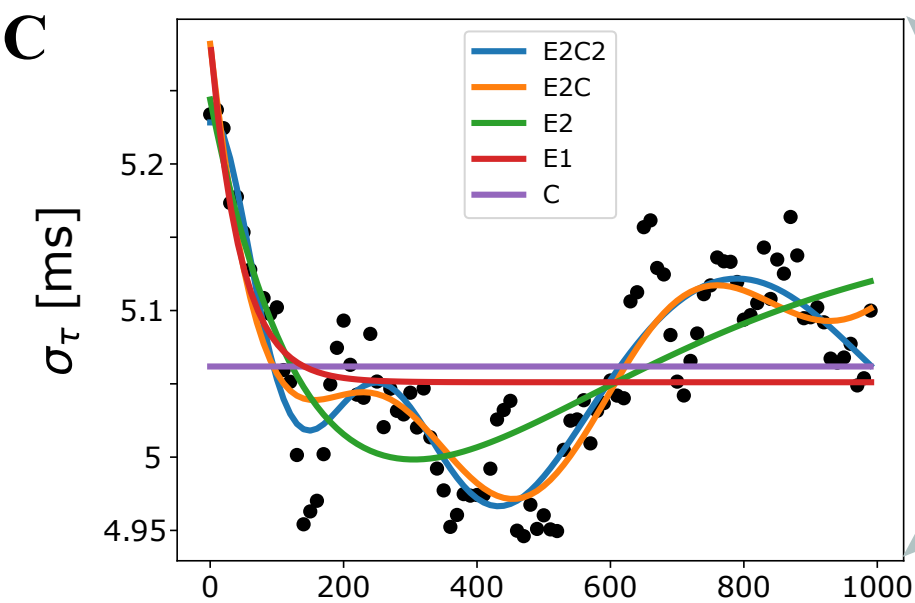

"zoom"

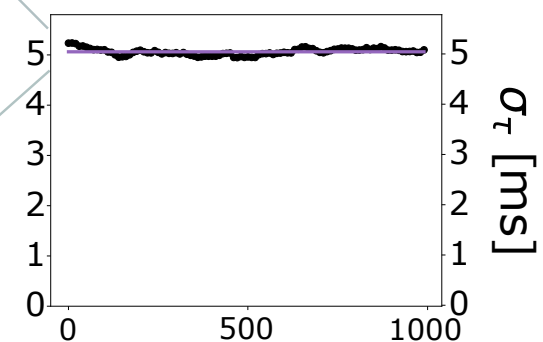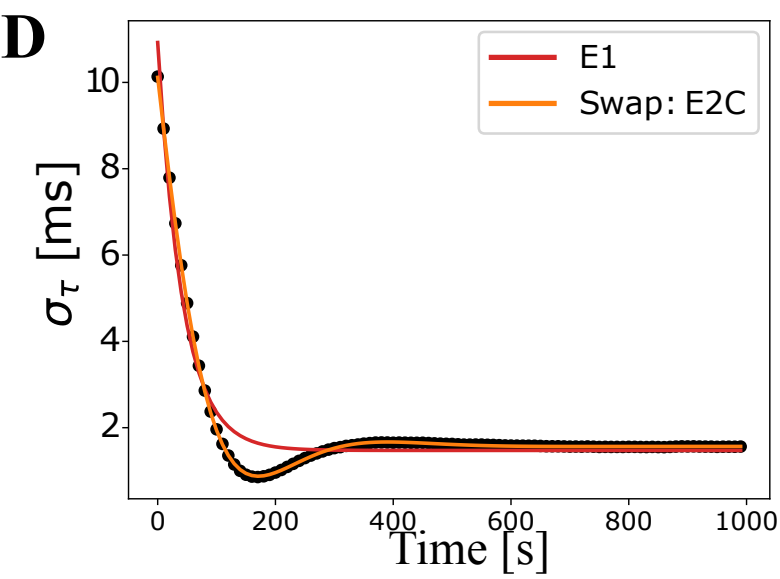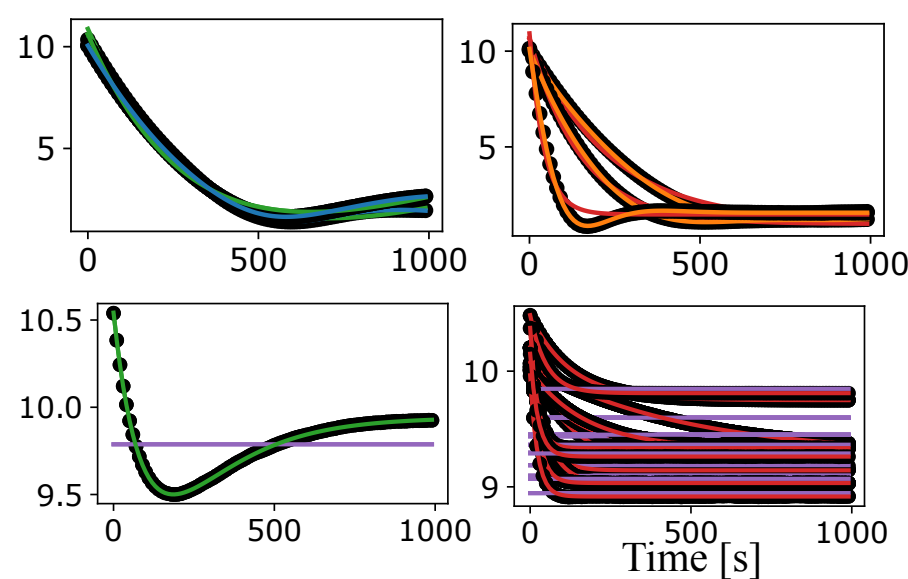

Supplement: supp [file elife-81982-supp-v1.zip]

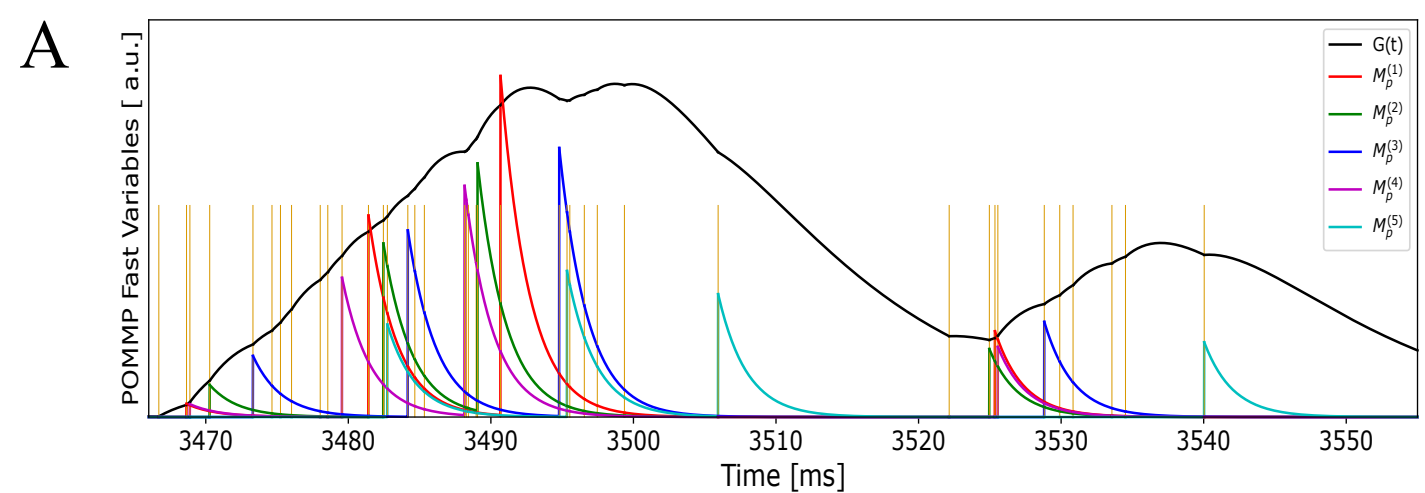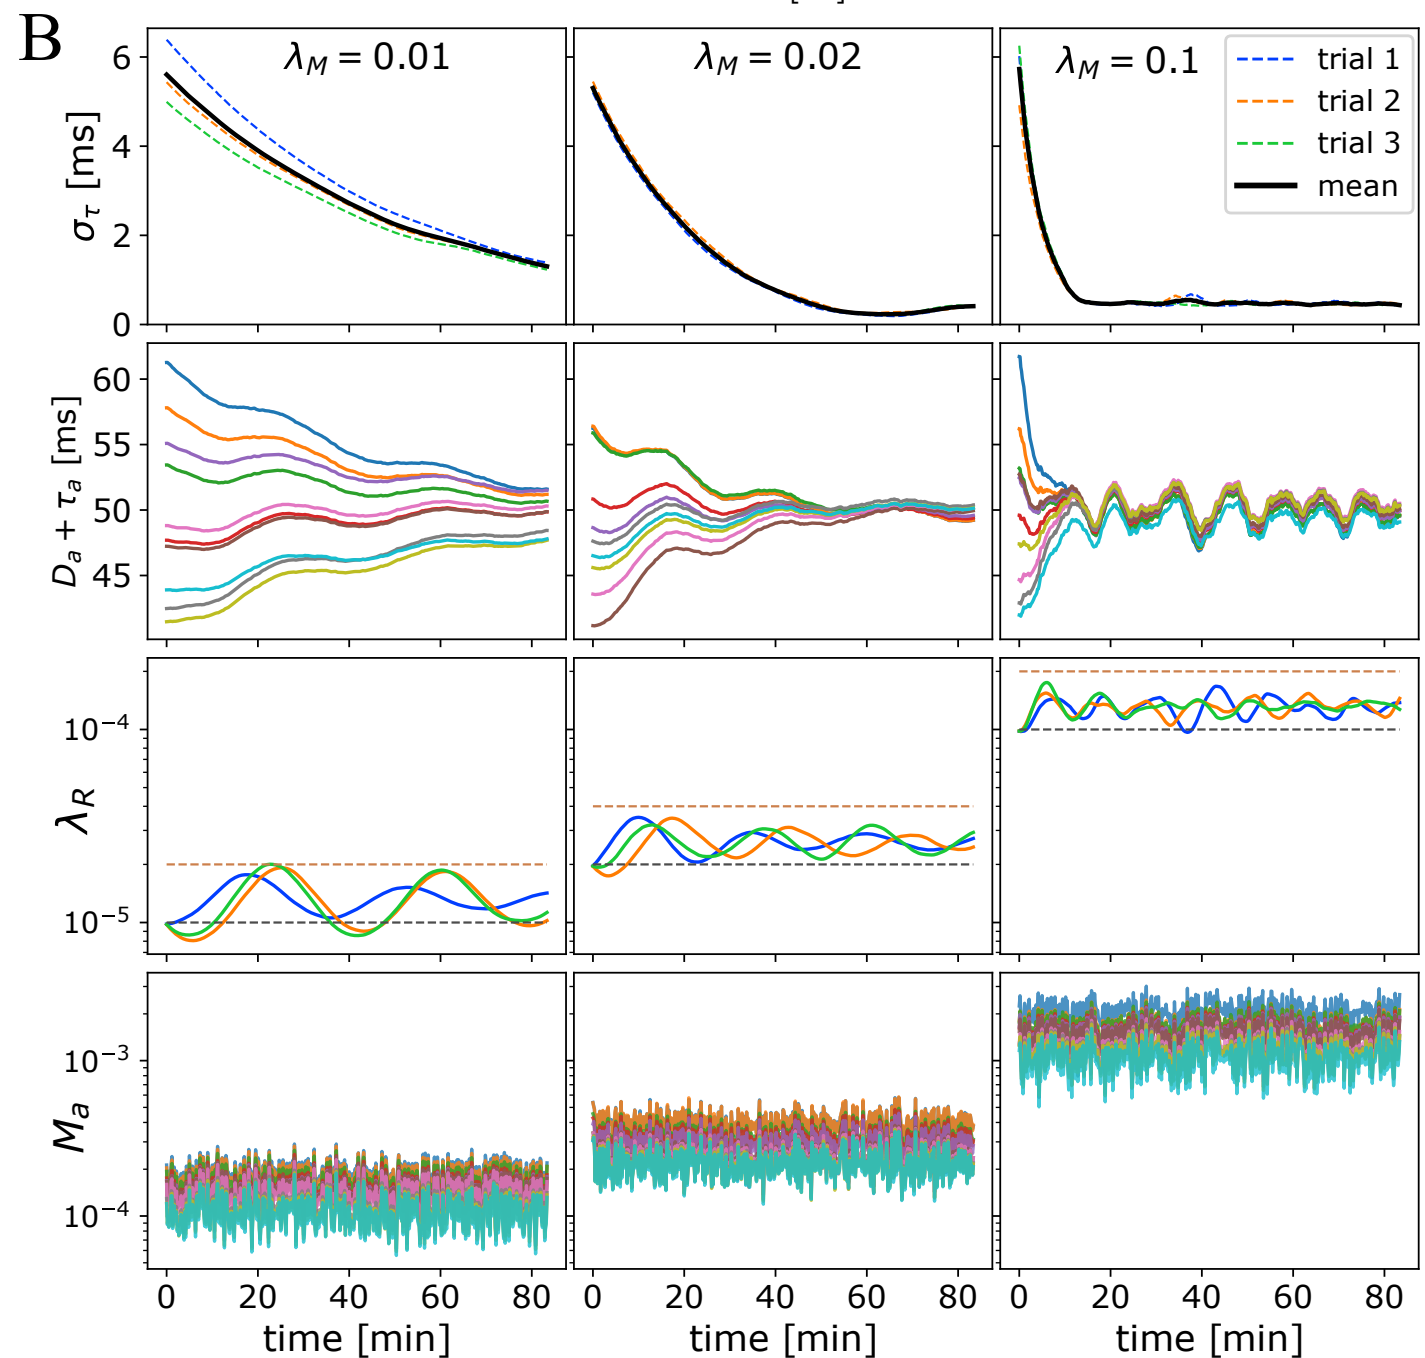

Supplement: supp [file elife-81982-supp-v1.zip]

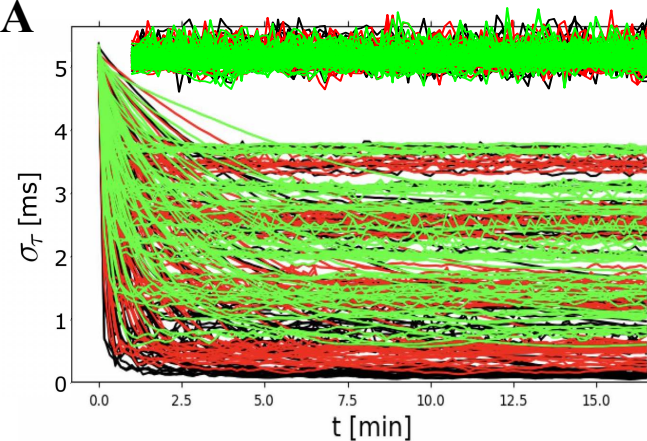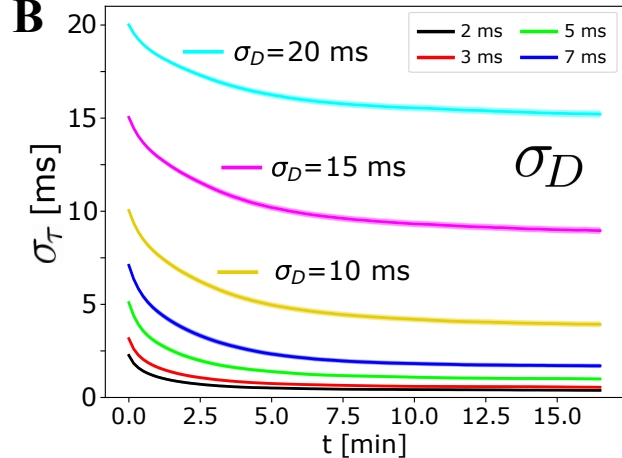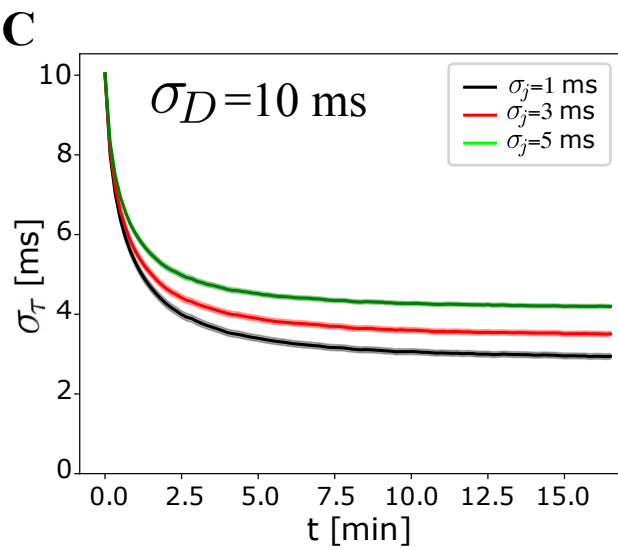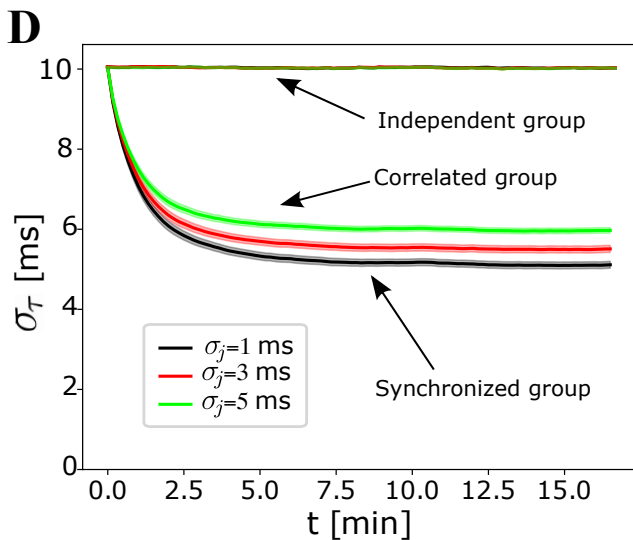

Supplement: supp [file elife-81982-supp-v1.zip]
